# Supplementary material
Source: PubMed Central journal article supplement (PMC2912475)
Supplement: emm-42-477-s001.pdf [file emm-42-477-s001.pdf]

## Supplemental Data

**Table S1.** IQGAP1 expression levels in tumor tissue compared to adjacent tissue

| Patients number | Tumor tissue/Adjacent tissue |
|-----------------|------------------------------|
| 1               | -                            |
| 2               | +                            |
| 3               | -                            |
| 4               | + / -                        |
| 5               | +                            |
| 6               | +                            |
| 7               | ++                           |
| 8               | -                            |
| 9               | -                            |
| 10              | ++                           |
| 11              | + / -                        |
| 12              | +                            |
| 13              | +++                          |
| 14              | ++                           |
| 15              | +                            |
| 16              | +                            |
| 17              | -                            |
| 18              | + / -                        |
| 19              | ++                           |
| 20              | -                            |
| 21              | -                            |
| 22              | +                            |
| 23              | +                            |
| 24              | -                            |
| 25              | -                            |
| 26              | + / -                        |
| 27              | +                            |
| 28              | ++                           |
| 29              | -                            |
| 30              | -                            |
| 31              | ++                           |
| 32              | +                            |
| 33              | +                            |

|    |       |
|----|-------|
| 34 | + / - |
| 35 | +     |
| 36 | + / - |
| 37 | +++   |
| 38 | -     |
| 39 | ++    |
| 40 | +     |
| 41 | -     |
| 42 | ++    |
| 43 | + / - |
| 44 | ++    |
| 45 | +     |
| 46 | -     |
| 47 | +++   |
| 48 | +     |
| 49 | +     |
| 50 | -     |
| 51 | +     |
| 52 | +     |
| 53 | +     |
| 54 | + / - |
| 55 | +     |

---

-: no change, +/- : change less than 1 fold, +: change less than 2 fold, ++: change less than 5 fold, +++: change more than 5 fold. Alterations more than 1 fold are considered.
